# Supplementary material for: Immune infiltration and a ferroptosis-associated gene signature for predicting the prognosis of patients with endometrial cancer
Source: PubMed Central journal article supplement (PMC8266342; doi:10.18632/aging.203190), 2021-06-24
Supplement: aging-13-203190-s001.pdf [file aging-13-203190-s001.pdf]

**SUPPLEMENTARY FIGURES**

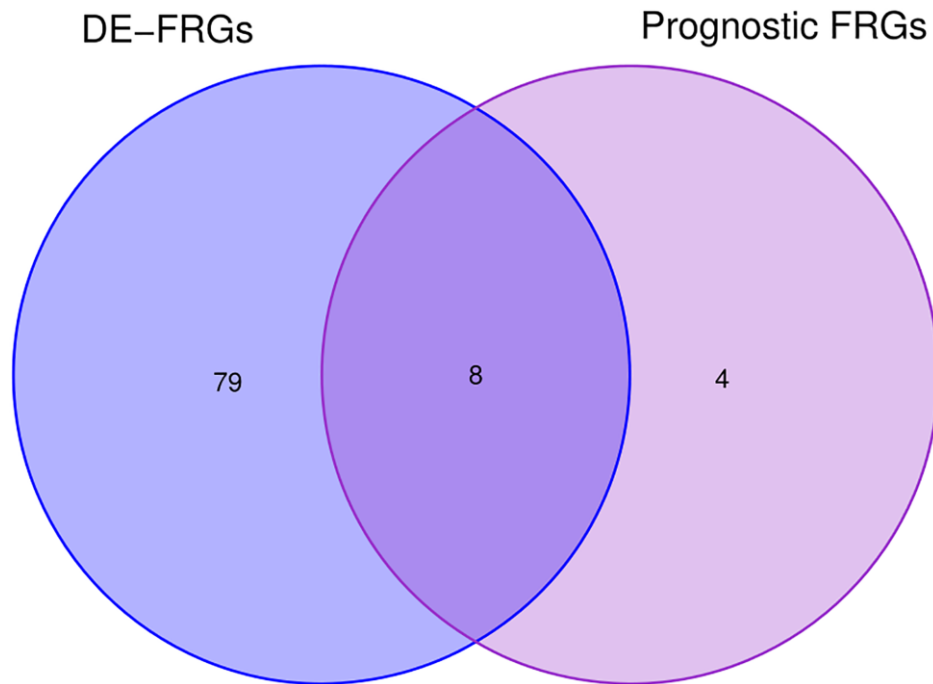

**Supplementary Figure 1. Venn diagram of 87 differentially expressed ferroptosis-related genes (DE-FRGs) between normal samples and EC patient samples and 12 prognostic FRGs.**

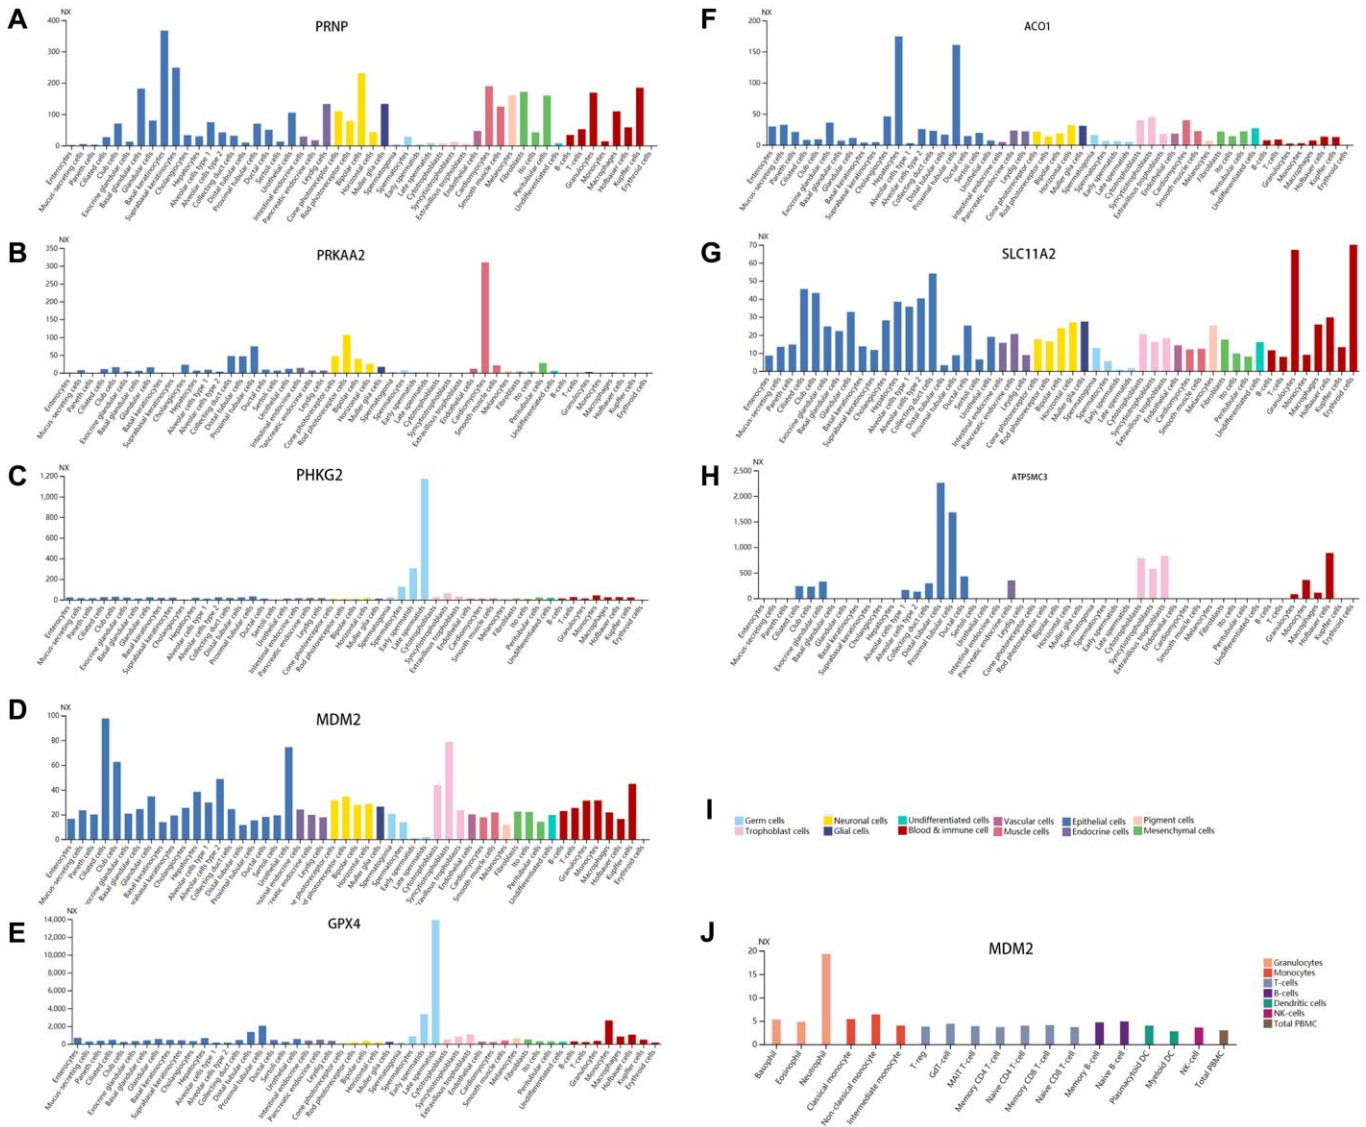

**Supplementary Figure 2.** (A–I) RNA single-cell analysis of 8 FRGs in normal human tissue cells. (J) MDM2 RNA single-cell analysis in blood cells.

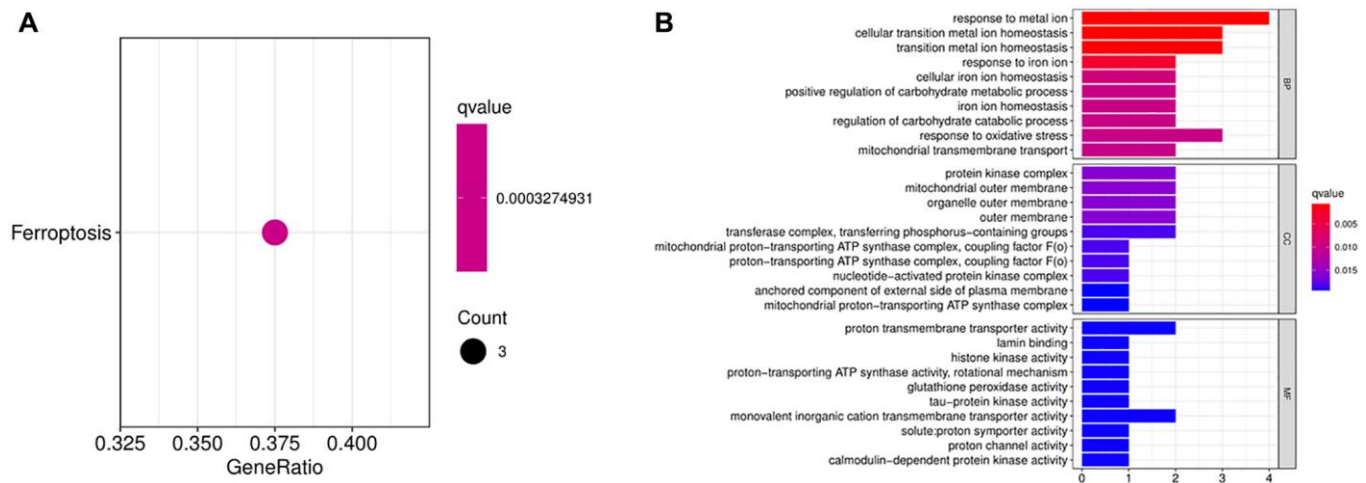

**Supplementary Figure 3.** (A) KEGG analysis of the eight ferroptosis-related genes (FRGs). (B) GO analysis of the eight FRGs.

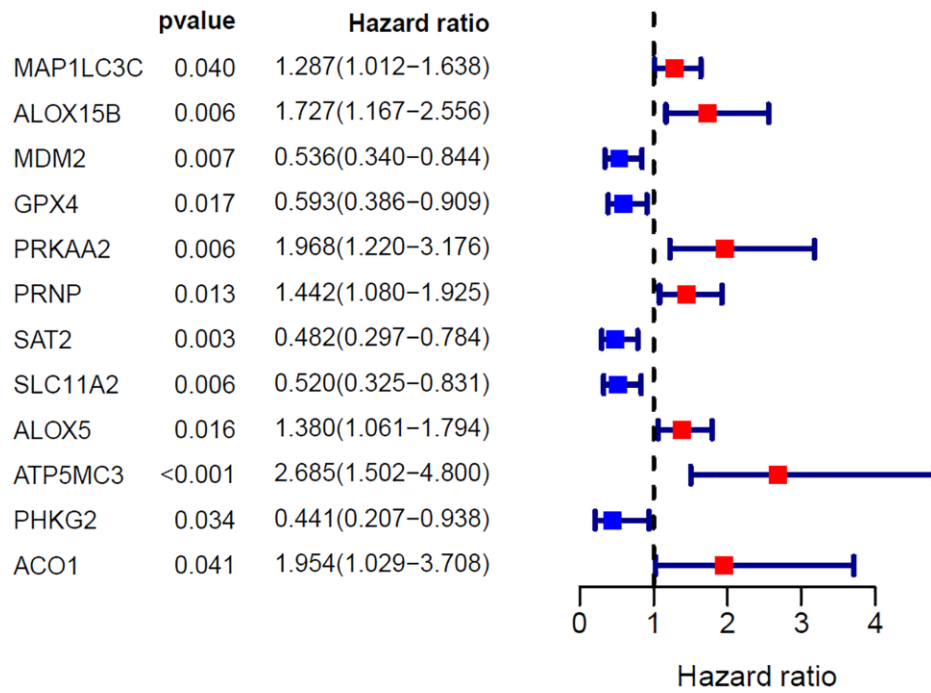

**Supplementary Figure 4. Results of the univariate Cox analysis of the twelve prognostic ferroptosis-related genes in EC patients.**
